# Supplementary material
Source: PubMed Central journal article supplement (PMC4641314)
Supplement: NIHMS65895-supplement-Figure_S2.pdf [file NIHMS65895-supplement-Figure_S2.pdf]

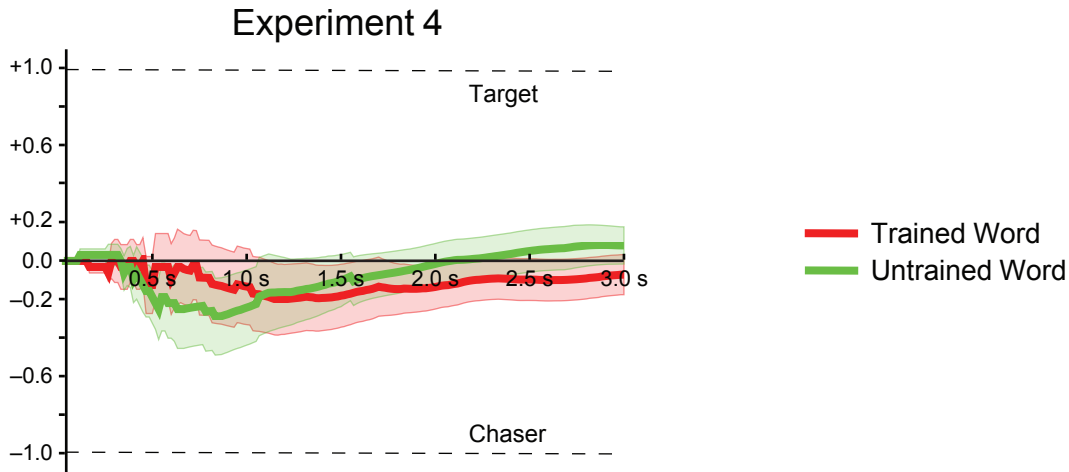

Fig. S2. Relative preference for the objects during the response phase of the test trials. The graphs show difference scores as a function of time in Experiment 4 for the trained-word condition and the untrained-word condition. The scores were calculated as the the difference between cumulative time spent looking at one object (e.g., the target) and cumulative time spent looking at the other object (e.g., the chaser) divided by the sum of these values. We statistically compared the difference scores for the trained-word and untrained-word conditions at the predefined time points of 1, 2, and 3 s from the beginning of the response phase. The dashed lines at the top and bottom of the graph represent difference scores of +1 (looking only at the target) and -1 (looking only at the chaser). Shaded areas represent  $\pm 1$  SE.
